# Supplementary material for: Comprehensive DFT investigation of transition-metal-based new quaternary Heusler alloys CoNbMnZ (Z = Ge, Sn): compatible for spin-dependent and thermoelectric applications
Source: Royal Society of Chemistry journal article supplement (doi:10.1039/d0ra08007a), 2020-01-01
Supplement: d0ra08007a1.pdf [file d0ra08007a1.pdf]

Electronic Supplementary Information;

Fig's S1 and S5 placed under supplementary information.

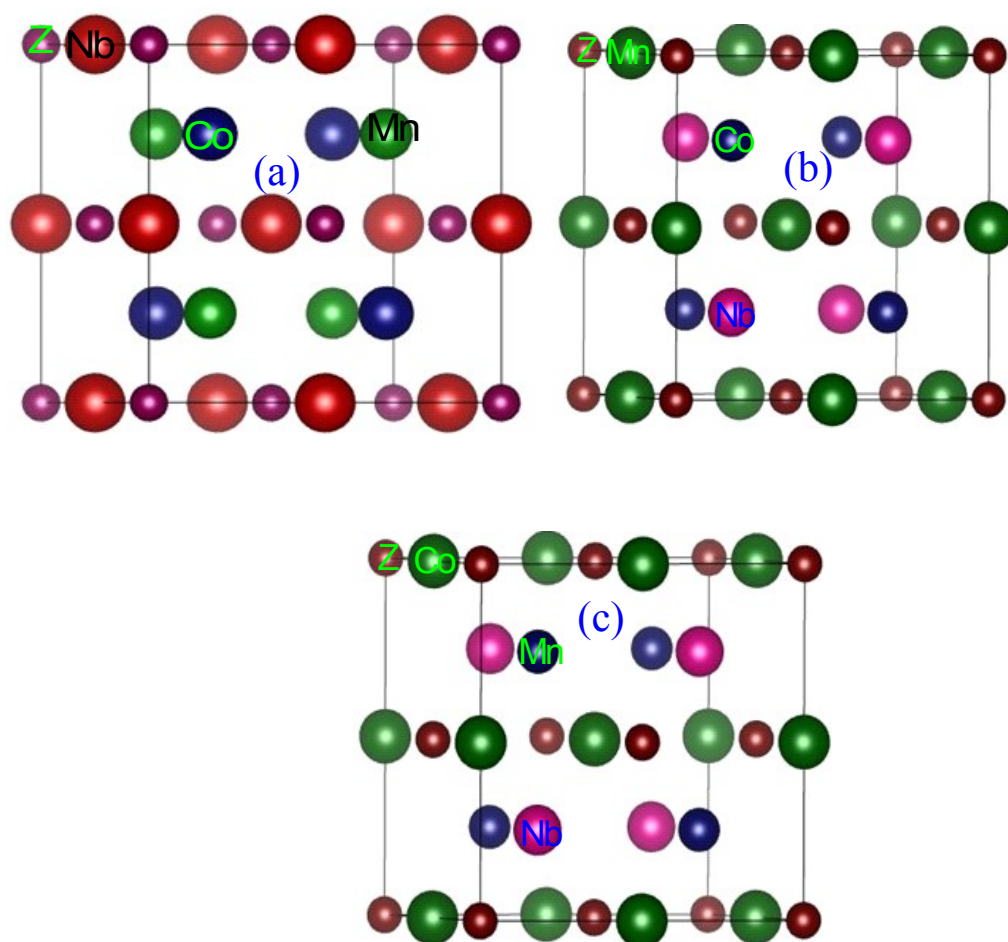

**Fig. S1 (a, b, c):** Different structural configurations of Quaternary Heusler alloys.

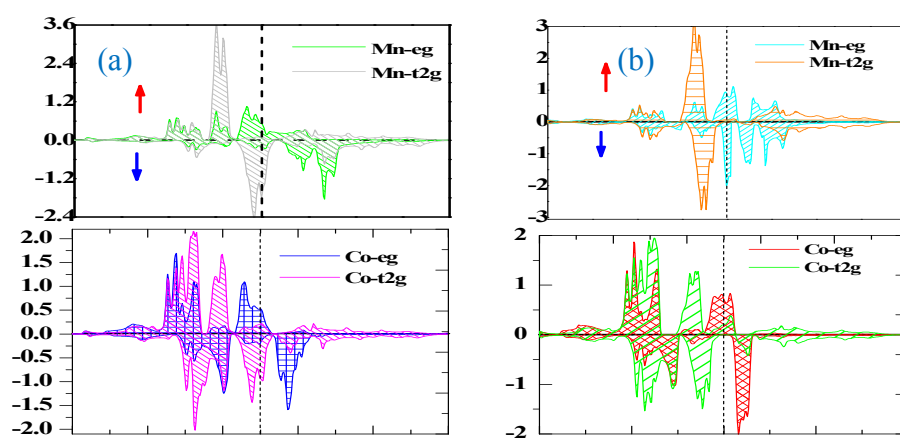

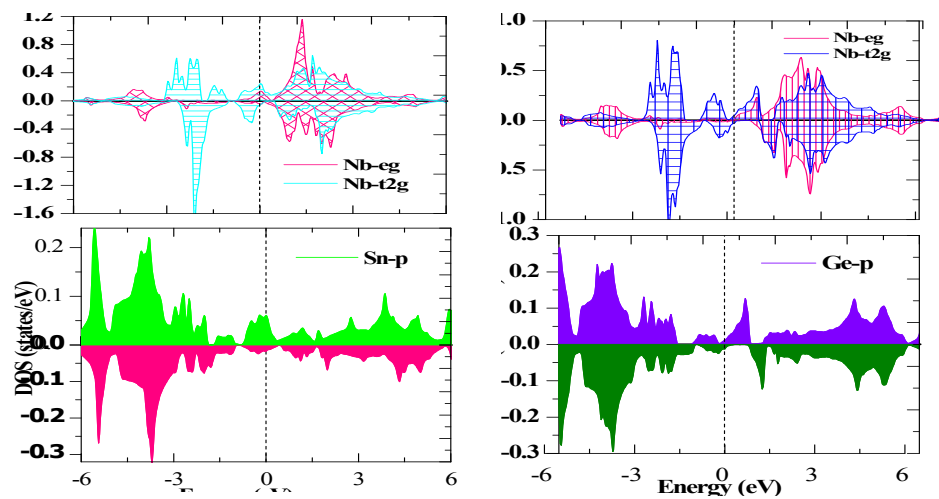

**Fig. S5 (a, b):** atom resolved pDOS of both alloys under GGA scheme.
